# Supplementary material for: The Effect of Knocked-Down Anti-Müllerian Hormone mRNA on Reproductive Characters of Male Nile Tilapia (Oreochromis niloticus) through Inhibition of the TGF-Beta Signaling Pathway
Source: MDPI journal article supplement (doi:10.3390/fishes7050299), 2022-10-21
Supplement: s1 [file s1]

Archive with 1 entries (1 files):
- Supplementary Material.pdf
